# Supplementary material
Source: ML conference proceedings conference paper supplement (https://openreview.net/forum?id=2oRz0NNOQQ)
Supplement: supplementary_material [file nips25_supp.pdf › nips25_supp.pdf]

## A Constructions of the Markov Chain and the "Hard" Function $F$

### A.1 Construction of Markov chains

In this section, we construct a Markov chain that is used for the lower bound proofs. The idea is to construct a chain such that 1) there exist two states between which at least  $\tau$  steps must be taken to transit; 2) the hitting time of the constructed chain is upper bounded by  $\tau$ . Without loss of generality we assume  $\tau$  is even.

In particular, we consider a directed cyclic-like chain with self-loops. Denote  $s = i$  be the  $i$ -th state of the Markov chain for  $i \in \{0, 1, \dots, 2\tau' + 1\}$  with  $\tau' = \tau/2$ . Then for any  $q \in (0, 1/2)$  the transition of the chain is defined as follows:

- $P(s = 2 | s = 0) = P(s = 0 | s = 0) = P(s = 2 | s = 1) = P(s = 1 | s = 1) = 1/2$ ;
- $P(s = \tau' + 3 | s = \tau' + 1) = P(s = \tau' + 1 | s = \tau' + 1) = P(s = \tau' + 3 | s = \tau' + 2) = P(s = \tau' + 2 | s = \tau' + 2) = 1/2$ ;
- $P(s = \tau' + 1 | s = \tau') = q, P(s = \tau' + 2 | s = \tau') = 1/2 - q, P(s = \tau' | s = \tau') = 1/2$ ;
- $P(s = 0 | s = 2\tau' + 1) = q, P(s = 1 | s = 2\tau' + 1) = 1/2 - q, P(s = 2\tau' + 1 | s = 2\tau' + 1) = 1/2$ ;
- $P(s = i + 1 | s = i) = P(s = i | s = i) = 1/2, \forall i \notin \{0, 1, \tau', \tau' + 1, \tau' + 2, 2\tau' + 1\}$ .

Then letting  $v_1^* = 0, v_2^* = 1, w_1^* = \tau' + 1, w_2^* = \tau' + 2$ , it is straightforward that the above constructed Markov chain guarantees that transitioning between  $v_1^*$  and  $w_1^*$  takes at least  $\tau' = \tau/2$  steps. Moreover, the hitting time of the chain is  $\mathcal{O}(\tau)$  by noting the hitting time of directed cyclic chain with self-loops and  $n$  states is  $\mathcal{O}(n)$ . We denote this chain by  $P^*$ , and hence  $P^* \in \mathcal{M}(\tau)$ .

### A.2 Construction of function $F$

Now we construct a "hard" function that is difficult for any first-order algorithm to search for the critical point. Specifically we consider the following two functions

$$h_1(x) = -\psi(1)\phi([x]_1) + \sum_{i=1}^{\lfloor d/2 \rfloor - 1} (\psi(-[x]_{2i})\phi(-[x]_{2i+1}) - \psi([x]_{2i})\phi([x]_{2i+1})) \quad (10)$$

$$h_2(x) = \sum_{i=1}^{\lfloor d/2 \rfloor} (\psi(-[x]_{2i-1})\phi(-[x]_{2i}) - \psi([x]_{2i-1})\phi([x]_{2i})) \quad (11)$$

where

$$\psi(u) = \begin{cases} 0 & , \quad u \leq \frac{1}{2} \\ \exp\left(1 - \frac{1}{(2u-1)^2}\right) & , \quad u > \frac{1}{2} \end{cases}$$

and

$$\phi(u) = \sqrt{e} \int_{-\infty}^u e^{-\frac{t^2}{2}} dt$$

with  $u \in \mathbb{R}$ .

We denote  $\pi_s$  as the corresponding probability of state  $s$  of the stationary distribution  $\pi$ . Then, given the Markov chain  $P^*$  constructed in Appendix A.1, we know that at least  $\frac{1}{2}\tau$  steps are required to take transiting from  $v_1^*$  to  $w_1^*$  and vice versa. Then, we construct function  $F$  such that  $F(x) = \pi_{v^*} h_1(x) + \pi_{w^*} h_2(x)$ , where we denote  $v^* = \{v_1^*, v_2^*\}$ ,  $w^* = \{w_1^*, w_2^*\}$  and  $\pi_{v^*} = \pi_{v_1^*} + \pi_{v_2^*}$ ,  $\pi_{w^*} = \pi_{w_1^*} + \pi_{w_2^*}$ . For any  $x$  and  $i \geq 0$  define  $x_{\leq i} := ([x]_1, \dots, [x]_i, 0, \dots, 0)$  as the truncated version by only keeping the first  $i$  coordinates. We also set  $x_{\leq 0} = x$ . Then we have the following properties of  $F$ .

**Lemma A.1.** *Let  $F(x) = \pi_{v^*} h_1(x) + \pi_{w^*} h_2(x)$  for  $h_1, h_2$  defined by (10), (11). Then we have the following:*

(1).  $F(0) - \inf_x F(x) \leq \Delta_0 d$  for some constant  $\Delta_0 > 0$ .

(2).  $\|\nabla h_i(x)\|_\infty \leq 23$  and  $\|\nabla h_i(x)\| \leq 23\sqrt{d}, i = 1, 2$ .

789 (3).  $F(x)$  is  $l_1$ -smooth for some constant  $l_1 > 0$ .

790 (4). If  $\text{prog}_1(x) < d$ ,  $\|\nabla F(x)\| \geq 1$ .

791 (5).  $[\nabla h_i(x)]_{\leq \text{prog}_{\frac{1}{2}}(x)} = [\nabla h_i(x_{\leq \text{prog}_{\frac{1}{2}}(x)})]_{\leq \text{prog}_{\frac{1}{2}}(x)}$ ,  $i = 1, 2$ .

792 (6). If  $\text{prog}_0(x)$  is odd,  $\text{prog}_0(\nabla h_1(x)) \leq \text{prog}_{\frac{1}{2}}(x)$ ,  $\text{prog}_0(\nabla h_2(x)) \leq \text{prog}_{\frac{1}{2}}(x) + 1$ . If  $\text{prog}_0(x)$   
 793 is even,  $\text{prog}_0(\nabla h_1(x)) \leq \text{prog}_{\frac{1}{2}}(x) + 1$ ,  $\text{prog}_0(\nabla h_2(x)) \leq \text{prog}_{\frac{1}{2}}(x)$ .

794 (7). If  $\text{prog}_{\frac{1}{2}}(x)$  is odd,  $\nabla h_1(x) = \nabla h_1(x_{\leq \text{prog}_{\frac{1}{2}}(x)})$ ,  $\nabla h_2(x) = \nabla h_2(x_{\leq 1 + \text{prog}_{\frac{1}{2}}(x)})$ . If  $\text{prog}_{\frac{1}{2}}(x)$  is  
 795 even,  $\nabla h_1(x) = \nabla h_1(x_{\leq 1 + \text{prog}_{\frac{1}{2}}(x)})$ ,  $\nabla h_2(x) = \nabla h_2(x_{\leq \text{prog}_{\frac{1}{2}}(x)})$ .

796 *Proof.* For Part (1), observing that  $F(0) < 0$  and noting that  $0 \leq \psi(u) \leq e$ ,  $0 \leq \phi(u) \leq \sqrt{2\pi e}$ ,

$$F(x) \geq -\psi(1)\phi([x]_1) - \sum_{i=2}^d \psi([x]_{i-1})\phi([x]_i) \geq -de\sqrt{2\pi e} = -d\Delta_0$$

797 with  $\Delta_0 = e\sqrt{2\pi e}$ , which completes its proof.

For Part (2), noting that  $0 \leq \psi'(u) \leq \sqrt{54e^{-1}}$  and  $0 \leq \phi'(u) \leq \sqrt{e}$ , combining with the fact that for each  $i = 1, 2$

$$\frac{\partial h_i}{\partial x_j}(x) \geq \psi(-[x]_{j-1})\phi'(-[x]_j) - \psi([x]_{j-1})\phi'([x]_j) - \psi'(-[x]_j)\phi(-[x]_{j+1}) - \psi'([x]_j)\phi([x]_{j+1})$$

yields

$$\left| \frac{\partial h_i}{\partial x_j}(x) \right| \leq e\sqrt{e} + \sqrt{54e^{-1}}\sqrt{2\pi e} \leq 23$$

798 implying  $\|\nabla h_i(x)\| \leq 23$  and  $\|\nabla h_i(x)\| \leq 23\sqrt{d}$ ,  $\forall i = 1, 2$ .

799 Parts (3) and (4) follow directly from [9]. Parts (5)-(7) follow from the observation that

$$\begin{aligned} \nabla h_1(x) &= \nabla h_1([x]_1, \dots, [x]_{2i+1}, 0, \dots, 0), \text{ if } |x_{2j}| \leq \frac{1}{2}, \forall j \geq i+1 \\ \nabla h_2(x) &= \nabla h_2([x]_1, \dots, [x]_{2i}, 0, \dots, 0), \text{ if } |x_{2j-1}| \leq \frac{1}{2}, \forall j \geq i+1. \end{aligned}$$

800

□

## 801 B Lower Bound for the Smooth Setting

802 In this section, we show the lower bound of the smooth setting in Theorem 3.1. Based on the  
 803 contructive  $F$  in the last section, we consider the following gradient oracle  $g$ : for each  $i$ -th coordinate  
 804 of  $g$

$$\begin{aligned} \text{if } s \in \{v_1^*, v_2^*\}, \quad [g(x; s)]_i &= [\nabla h_1(x)]_i \cdot \left( 1 + \mathbb{1}\{i > \text{prog}_{\frac{1}{2}}(x)\} \left( \frac{\mathbb{1}_{s=v_1^*}}{q} - 1 \right) \right), \\ \text{if } s \in \{w_1^*, w_2^*\}, \quad [g(x; s)]_i &= [\nabla h_2(x)]_i \cdot \left( 1 + \mathbb{1}\{i > \text{prog}_{\frac{1}{2}}(x)\} \left( \frac{\mathbb{1}_{s=w_1^*}}{q} - 1 \right) \right), \\ \text{otherwise, } g(x; s) &= 0. \end{aligned} \tag{12}$$

805 Recalling the definition of  $P^*$ , we note  $\mathbb{P}(s = v_1^* \mid s \in \{v_1^*, v_2^*\}) = \mathbb{P}(s = w_1^* \mid s \in \{w_1^*, w_2^*\}) =$   
 806  $q \in (0, 1/2)$ . Then, we have the following lemma.

807 **Lemma B.1.** *Considering stochastic gradient  $g(x; s)$  constructed as (12), the following statements*  
 808 *hold:*

809 (1). *For  $s \in \{v_1^*, v_2^*, w_1^*, w_2^*\}$ , with probability at least  $1 - q$ ,  $\text{prog}_0(g(x; s)) \leq \text{prog}_{\frac{1}{2}}(x)$  and*  
 810  *$g(x; s) = g(x_{\leq \text{prog}_{\frac{1}{2}}(x)}; s)$  for all  $x$ .*

811 (2). For  $s \notin \{v_1^*, v_2^*, w_1^*, w_2^*\}$ , with probability 1,  $\text{prog}_0(g(x; s_t)) \leq \text{prog}_{\frac{1}{2}}(x)$  and  $g(x; s_t) =$   
812  $g(x_{\leq \text{prog}_{\frac{1}{2}}(x)}; s_t)$  for all  $x$ .

813 (3). For any  $s$ , with probability 1,  $\text{prog}_0(g(x; s)) \leq 1 + \text{prog}_{\frac{1}{2}}(x)$  and  $g(x; s) = g(x_{\leq 1 + \text{prog}_{\frac{1}{2}}(x)}; s)$   
814 for all  $x$ .

815 (4).  $\mathbb{E}_{s \sim \pi}[g(x; s)] = \nabla F(x)$ .

816 *Proof.* We firstly show Part (3). Note that by (12) and Part (7) of Lemma A.1, for any  $x, s$ ,  
817  $[g(x; s_t)]_i = 0, \forall i > 1 + \text{prog}_{\frac{1}{2}}(x)$  in the sense that  $[\nabla h_1(x)]_i = [\nabla h_2(x)]_i = 0, \forall i > 1 + \text{prog}_{\frac{1}{2}}(x)$ ,  
818 which implies  $\text{prog}_0(g(x; s)) \leq 1 + \text{prog}_{\frac{1}{2}}(x)$ . Moreover, by Part (7) of Lemma A.1, defin-  
819 ing  $x' := x_{\leq 1 + \text{prog}_{\frac{1}{2}}(x)}$  gives  $\nabla h_1(x) = \nabla h_1(x')$  and  $\nabla h_2(x) = \nabla h_2(x')$ . Thus, we obtain  
820  $g(x; s) = g(x'; s)$  for any  $x, s$ , implying Part (3).

821 For Part (1), we note that when  $i \geq 1 + \text{prog}_{\frac{1}{2}}(x)$  and  $s \in \{v_2^*, w_2^*\}$ ,  $g(x; s) = [\nabla h_j(x)]_{\leq \text{prog}_{\frac{1}{2}}(x)}$   
822 for  $j = 1, 2$ , which implies  $\text{prog}_0(g(x; s)) \leq \text{prog}_{\frac{1}{2}}(x), \forall s \in \{v_2^*, w_2^*\}$ . Further, according to (5) of  
823 Lemma A.1, we have  $g(x; s) = g(x_{\leq \text{prog}_{\frac{1}{2}}(x)}; s)$  for  $s \in \{v_2^*, w_2^*\}$  and all  $x$ . Since  $P(z = 0) = 1 - q$ ,  
824 hence Part (1) is proved.

825 Part (2) holds trivially in the sense that  $g(x; s_t) = 0$  when  $s \notin \{v_1^*, v_2^*, w_1^*, w_2^*\}$ . Finally, Part (4)  
826 holds since  $\mathbb{E}[\mathbb{1}_s/q \mid s \in \{v_1^*, v_2^*\}] = \mathbb{E}[\mathbb{1}_s/q \mid s \in \{w_1^*, w_2^*\}] = 1$ .  $\square$

827 Also, we show in the following lemma that  $g$  has bounded variance.

**Lemma B.2.** For  $F(x) = \pi_{v^*} h_1(x) + \pi_{w^*} h_2(x)$  and  $g$  defined as (12), then for any Markov chain  
with stationary distribution  $\pi$ , given any  $x \in \mathbb{R}^d$ ,

$$\mathbb{E}_{s \sim \pi} \|g(x; s) - \nabla F(x)\|^2 \leq a_1 d + a_2 \frac{1 - q}{q}$$

828 for some constant  $a_1, a_2 > 0$ .

829 *Proof.* By Part (4) of Lemma B.1, we know  $\mathbb{E}_{s \sim \pi}[g(x; s)] = \nabla F(x)$ .

830 Denote  $i^* = 1 + \text{prog}_{\frac{1}{2}}(x)$ . For any  $s \in \{v_1^*, v_2^*, w_1^*, w_2^*\}$ , we have

$$\begin{aligned} g(x; s) - \nabla F(x) &= (0, \dots, 0, [\nabla h_1(x)]_{i^*} (\mathbb{1}_{s=v_1^*}/q - 1), 0, \dots, 0) + (1 - \tilde{\pi}_{v^*}) \nabla h_1(x) - \tilde{\pi}_{w^*} \nabla h_2(x), \text{ if } s \in \{v_1^*, v_2^*\} \\ g(x; s) - \nabla F(x) &= (0, \dots, 0, [\nabla h_2(x)]_{i^*} (\mathbb{1}_{s=w_1^*}/q - 1), 0, \dots, 0) + (1 - \tilde{\pi}_{w^*}) \nabla h_2(x) - \tilde{\pi}_{v^*} \nabla h_1(x), \text{ if } s \in \{w_1^*, w_2^*\}. \end{aligned}$$

When  $i^* - 1$  is odd, from Part (6) of Lemma A.1 we know that  $[\nabla h_1(x)]_{i^*} = 0$ . Therefore,

$$\|g(x; s) - \nabla F(x)\|^2 \leq 2\|\nabla h_1(x)\|^2 + 2\|\nabla h_2(x)\|^2 \leq 4 \cdot 23^2 d, \quad s \in \{v_1^*, v_2^*\}$$

831

$$\begin{aligned} \|g(x; s) - \nabla F(x)\|^2 &\leq 3|[\nabla h_2(x)]_{i^*}|^2 (\mathbb{1}_{s=w_1^*}/q - 1)^2 + 3\|\nabla h_1(x)\|^2 + 3\|\nabla h_2(x)\|^2 \\ &\leq 3 \cdot 23^2 (\mathbb{1}_{s=w_1^*}/q - 1)^2 + 6 \cdot 23^2 d, \quad s \in \{w_1^*, w_2^*\} \end{aligned}$$

832 and

$$\|g(x; s_t) - \nabla F(x)\|^2 = \|\nabla F(x)\|^2 \leq 4 \cdot 23^2 d, \quad \text{when } s \notin \{v_1^*, v_2^*, w_1^*, w_2^*\}$$

where we use (2) of Lemma A.1. Combining the above three inequalities, it yields that when  $i^* - 1$   
is odd, for any Markov chain, any  $x, t \geq 0$  and any initial distribution of the chain,

$$\mathbb{E} \|g(x; s_t) - \nabla F(x)\|^2 \leq a_1 d + a_2 \frac{1 - q}{q}$$

833 where  $a_1 = 6 \cdot 23^2, a_2 = 3 \cdot 23^2$  and we use that  $\mathbb{E}[(\mathbb{1}_s/q - 1)^2 \mid s \in \{w_1^*, w_2^*\}] = (1 - q)/q$ . The  
834 case when  $i^* - 1$  is even can be derived similarly.  $\square$

835 Then, we are ready to show Lemmas 5.1 and 5.2. We first focus on the case  $B = 1$  and then generalize  
 836 it to  $B \geq 1$ .

837 *Proof of Lemmas 5.1 and 5.2:* Given any  $\epsilon > 0$ , we consider the following  $F^*$

$$F^*(x) := \frac{L\lambda^2}{l_1} F\left(\frac{x}{\lambda}\right), \text{ where } \lambda = \frac{2l_1}{L}\epsilon. \quad (13)$$

And we consider the following gradient  $g^*$

$$g^*(x; s) := \frac{L\lambda}{l_1} g\left(\frac{x}{\lambda}; s\right)$$

with  $g(x; s)$  defined as (12). Since  $\nabla F(x) = \mathbb{E}_{s \sim \pi}[g(x; s)]$ ,  $\nabla F^*(x) = \mathbb{E}_{s \sim \pi}[g^*(x; s)]$ . We note that

$$\nabla^2 F^*(x) = \frac{L}{l_1} \nabla^2 F\left(\frac{x}{\lambda}\right)$$

which implies that  $F^*$  is  $L$ -smooth by Part (3) of Lemma A.1. Moreover, by Part (1) of Lemma A.1 we obtain that

$$F^*(0) - \inf_x F^*(x) = \frac{4l_1\epsilon^2}{L} (F(0) - \inf_x F(x)) \leq \frac{4l_1\Delta_0\epsilon^2}{L} d.$$

838 All the above concludes Lemma 5.1.

839 To see Lemma 5.2, note by Lemma B.2, we have

$$\mathbb{E}_{s \sim \pi} \|g^*(x; s) - \nabla F^*(x)\|^2 \leq 4a_1 d \epsilon^2 + \frac{4a_2(1-q)}{q} \epsilon^2.$$

Then, define

$$B_t := \mathbb{1} \left\{ \exists x : \text{prog}_0(g^*(x; s_t)) = 1 + \text{prog}_{\frac{1}{2}}(x) \right\}.$$

Note that under the construction of the Markov chain  $P^*$  and  $F^*$  and  $g^*$ , for any zero-respecting algorithm  $\mathcal{A}$

$$B_{t+k} = 0, \quad \forall k = 1, \dots, \frac{1}{2}\tau, \text{ conditioning on } B_t = 1.$$

That is to say within every  $\frac{1}{2}\tau$  iterations  $B_t$  can be 1 at most once. And Part (1) of Lemma B.1 indicates that the probability of  $B_t$  being 1 is no greater than  $q$ . Let  $k(t) := \max_{m \in [M]} \max_{l \leq t} \text{prog}_0(x_{l,m}^{\mathcal{A}[O]_{F^*}})$ . Then, the above implies that

$$k(t) \leq \sum_{l \leq t} B_l.$$

Also recalling the definition of  $P^*$  guarantees for any  $t$  in the ideal case the number of possible non-zero  $B_l$  can be at most  $2t/\tau$  with each being 1 with probability at most  $q$ , it implies

$$\sum_{l \leq t} B_l \leq \sum_{i=1}^{\lceil 2t/\tau \rceil} z_i$$

840 where  $z_i$  denotes the Bernoulli random variable with succeeding probability being at most  $q$ . Note  
 841 that  $z_i$ s are independent in the sense that conditioning on the chain hits  $v^* = \{v_1^*, v_2^*\}$  and will hit  
 842  $w^* = \{w_1^*, w_2^*\}$  at exactly  $\tau/2$  steps later, whether  $w_1^*$  or  $w_2^*$  will be visited is independent of which  
 843 of  $v_1^*$  or  $v_2^*$  has been visited. Thus

$$\begin{aligned} \mathbb{P}(k(t) \geq d) &\leq \mathbb{P}\left(\sum_{l \leq t} B_l \geq d\right) \\ &= \mathbb{P}\left(\exp\left(\sum_{l \leq t} B_l\right) \geq e^d\right) \\ &\leq e^{-d} \mathbb{E}[e^{\sum_{l \leq t} B_l}] \\ &\leq e^{-d} \mathbb{E}[e^{\sum_{i=1}^{\lceil 2t/\tau \rceil} z_i}] \\ &= e^{-d} (1-q+eq)^{\lceil 2t/\tau \rceil} \\ &\leq e^{\lceil 4t/\tau \rceil q - d} \end{aligned}$$

Therefore, we conclude that for any  $\delta \in (0, 1)$  and  $q \in (0, 1/2)$  with probability at least  $1 - \delta$ ,

$$k(t) < d, \quad \forall t \leq \frac{\tau(d - \log(1/\delta))}{4q}$$

which completes the proof of Lemma 5.2.

*Proof of Lemma 5.4:* To see the part of the smooth setting of Lemma 5.4, note that for any algorithm  $\mathcal{A}$  with  $B \geq 1$ , we simply observe that by the construction of  $F^*$  and  $g^*$  and the Markov chain  $P^*$ , for any  $t \geq 0$  and  $m \in [M]$ , there exists an algorithm  $\tilde{\mathcal{A}}$  with  $B = 1$  for which  $\text{prog}_0(x_{t,m}^{\mathcal{A}[O_{F^*}]}) \leq \text{prog}_0(x_{t,m}^{\tilde{\mathcal{A}}[O_{F^*}]})$ , since multiple samples do not contribute to additional progress of  $x$ , which then proves the part of smooth setting (Similar claims can be achieved for the mean-squared setting of Lemma 5.4).

*Proof of the smooth setting of Theorem 3.1:* Now to show the lower bound for the smooth setting of Theorem 3.1, setting

$$d = \min \left\{ \left\lfloor \frac{L\Delta}{4l_1\Delta_0\epsilon^2} \right\rfloor, \left\lfloor \frac{\sigma^2}{8a_1\epsilon^2} \right\rfloor \right\} \quad (14)$$

and

$$\frac{1}{q} = 1 + \frac{\sigma^2}{8a_2\epsilon^2} \quad (15)$$

yields that  $F^* \in \mathcal{F}(\Delta, L)$  and Assumption 2.3 is satisfied. By Part (4) of Lemma A.1 and Lemma 5.2, choosing  $\delta = 1/2$  renders that for any  $m \in [M]$  with probability at least  $1/2$ ,

$$\|\nabla F^*(x_{t,m}^{\mathcal{A}[O_{F^*}]})\| \geq 2\epsilon, \quad \forall t \leq \frac{\tau(d-1)}{4q}$$

which implies that

$$\mathbb{E}\|\nabla F^*(x_{t,m}^{\mathcal{A}[O_{F^*}]})\| \geq \epsilon, \quad \forall t \leq \frac{\tau(d-1)}{4q}.$$

Therefore, we conclude that

$$N_s^\epsilon(M, \Delta, L, \sigma^2, \tau) \geq \frac{\tau(d-1)}{4q} \succeq \frac{\tau L\Delta}{\epsilon^2} + \frac{\tau\sigma^2}{\epsilon^4} \min\{c_1\sigma^2, c_2L\Delta\}$$

by the selections of  $d, q$  as (14),(15) for some constants  $c_1, c_2 > 0$ .

## C Lower Bound for the Mean-squared Setting

In this section, we show the lower bound of the mean-squared smooth setting in Theorem 3.1. The idea is similar to the proof for the smooth setting, except that we replace the indicator function in (12) by its smoothed surrogate:

$$\Theta_i(x) := \Gamma \left( 1 - \left( \sum_{k=i}^d \Gamma^2(|x_k|) \right)^{1/2} \right) \quad (16)$$

where  $\Gamma$  is defined by

$$\Gamma(t) = \frac{\int_{1/4}^t \Delta(\tau) d\tau}{\int_{1/4}^{1/2} \Delta(\tau) d\tau}$$

with

$$\Delta(t) = \begin{cases} 0, & t \leq 1/4 \text{ or } t \geq 1/2 \\ \exp(1/(100(t-1/4)(t-1/2))), & 1/4 < t < 1/2. \end{cases}$$

Then, we consider the following stochastic gradient  $\bar{g}$ :

$$\begin{aligned} \text{if } s \in \{v_1^*, v_2^*\}, \quad [\bar{g}(x; s)]_i &= [\nabla h_1(x)]_i \cdot \left( 1 + \Theta_i(x) \left( \frac{\mathbb{1}_{s=v_1^*}}{q} - 1 \right) \right), \\ \text{if } s \in \{w_1^*, w_2^*\}, \quad [\bar{g}(x; s)]_i &= [\nabla h_2(x)]_i \cdot \left( 1 + \Theta_i(x) \left( \frac{\mathbb{1}_{s=w_1^*}}{q} - 1 \right) \right), \\ \text{otherwise, } \bar{g}(x; s) &= 0. \end{aligned} \quad (17)$$

It is straightforward to see  $\mathbb{E}_{s \sim \pi}[\bar{g}(x; s)] = \nabla F(x)$ . According to Observation 1 of [5], we know  $\Theta_i(x) = 0, \forall i \leq \text{prog}_{\frac{1}{2}}(x)$  and hence  $[\bar{g}(x; s)]_i = [\nabla h_j(x)]_i, j = 1, 2, \forall i \leq \text{prog}_{\frac{1}{2}}(x)$  when  $s \in \{v_1^*, v_2^*, w_1^*, w_2^*\}$ . Moreover, according to Part (6) of Lemma A.1, we have for any  $s \in \mathcal{S}$

$$[\bar{g}(x; s)]_i = 0, \quad \forall i > 1 + \text{prog}_{\frac{1}{2}}(x).$$

860 Defining  $\delta(x; s) := \bar{g}(x; s) - \nabla F(x)$ , it yields that there is exactly one non-zero coordinate of  $\delta(x; s)$ ,  
861 which is the  $1 + \text{prog}_{\frac{1}{2}}(x)$ -th coordinate. Moreover, we have the following results for  $\bar{g}$ .

862 **Lemma C.1.** Consider  $\bar{g}$  defined as (17). Then,

$$\mathbb{E}_{s \sim \pi} \|\bar{g}(x; s) - \nabla F(x)\|^2 \leq a_3 d + a_4 \frac{1-q}{q} \quad (18)$$

863 for some constants  $a_3, a_4 > 0$ . And for some constant  $\bar{l}_1 > 0$

$$\mathbb{E}_{s \sim \pi} \|\bar{g}(x; s) - \bar{g}(y; s)\|^2 \leq \frac{\bar{l}_1^2}{q} \|x - y\|^2, \quad \forall x, y \in \mathbb{R}^d. \quad (19)$$

864 *Proof.* Similar to the proof of Lemma B.2, we can easily obtain (18). To show (19), note that

$$\begin{aligned} \mathbb{E} \|\bar{g}(x; s) - \bar{g}(y; s)\|^2 &= \mathbb{E} \|\delta(x; s) - \delta(y; s)\|^2 + \|\nabla F(x) - \nabla F(y)\|^2 \\ &= \sum_{i \in \{i_x^*, i_y^*\}} \mathbb{E} ([\delta(x; s)]_i - [\delta(y; s)]_i)^2 + \|\nabla F(x) - \nabla F(y)\|^2 \end{aligned}$$

865 where  $i_x^* = 1 + \text{prog}_{\frac{1}{2}}(x)$ ,  $i_y^* = 1 + \text{prog}_{\frac{1}{2}}(y)$ . Since

$$\begin{aligned} \mathbb{E} ([\delta(x; s)]_i - [\delta(y; s)]_i)^2 &= ([\nabla F(x)]_i \Theta_i(x) - [\nabla F(y)]_i \Theta_i(y))^2 \frac{1-q}{q} \\ &= ([\nabla F(x)]_i (\Theta_i(x) - \Theta_i(y)) + [\nabla F(x) - \nabla F(y)]_i \Theta_i(y))^2 \frac{1-q}{q} \\ &\leq 2([\nabla F(x)]_i^2 (\Theta_i(x) - \Theta_i(y))^2 + [\nabla F(x) - \nabla F(y)]_i^2 \Theta_i(y)^2) \frac{1}{q} \end{aligned}$$

and by Observation 1.3 of [5]  $|\Theta_i(x) - \Theta_i(y)| \leq 36\|x - y\|$  and noting  $|\Theta_i(x)| \leq 1, \|\nabla F(x)\|_\infty \leq 23$ , we obtain

$$\mathbb{E} ([\delta(x; s)]_i - [\delta(y; s)]_i)^2 \leq \frac{2}{q} (23^2 \cdot 36^2 \|x - y\|^2 + \|\nabla F(x) - \nabla F(y)\|^2).$$

Finally leveraging Part (3) of Lemma A.1 gives

$$\mathbb{E} \|\bar{g}(x; s) - \bar{g}(y; s)\|^2 \leq \frac{\bar{l}_1^2}{q} \|x - y\|^2$$

866 with  $\bar{l}_1^2 = 4 \cdot 23^2 \cdot 36^2 + 5l_1^2$ . □

867 Then we show the lower bound corresponding to the mean-squared smooth setting of Theorem 3.1.

868 *Proof of the mean-squared smooth setting of Theorem 3.1 and Lemma 5.3:* Noting that  $\bar{L}$ -mean-  
869 squared smoothness implies  $\bar{L}$  smoothness, we thus consider the case  $L \leq \bar{L}$  with  $L$  to be determined  
870 later. Consider the same  $F^*$  as (13) and let  $\bar{g}^*(x; s) = (L\lambda/l_1)\bar{g}(x/\lambda; s)$ . Similarly, we have  $F^*$  is  
871  $L$ -smooth. Also

$$\mathbb{E}_{s \sim \pi} \|\bar{g}^*(x; s) - \nabla F^*(x)\|^2 \leq \left(\frac{L\lambda}{l_1}\right)^2 (a_3 d + a_4(1-q)/q)$$

872 and

$$\begin{aligned} \mathbb{E}_{s \sim \pi} \|\bar{g}^*(x; s) - \bar{g}^*(y; s)\|^2 &= \left(\frac{L\lambda}{l_1}\right)^2 \mathbb{E}_{s \sim \pi} \|\bar{g}(x/\lambda; s) - \bar{g}(y/\lambda; s)\|^2 \\ &\leq \left(\frac{L\bar{l}_1}{l_1\sqrt{q}}\right)^2 \|x - y\|^2. \end{aligned}$$

Then taking

$$d = \min \left\{ \left\lfloor \frac{L\Delta}{4l_1\Delta_0\epsilon^2} \right\rfloor, \left\lfloor \frac{\sigma^2}{8a_3\epsilon^2} \right\rfloor \right\}$$

$$\frac{1}{q} = \max \left\{ 1 + \frac{\sigma^2}{8a_4\epsilon^2}, \frac{\bar{l}_1^2}{l_1^2} \right\}$$

$$L = \frac{\bar{L}l_1\sqrt{q}}{\bar{l}_1} \leq \bar{L}$$

we guarantee that  $F^* \in \mathcal{F}(L, \Delta)$  and Assumptions 2.3, 2.4 are satisfied. Similar to the proof of the smooth setting, we can easily obtain Lemma 5.3 and then conclude that

$$N^\epsilon(M, \Delta, \bar{L}^2, \sigma^2, \tau) \succeq \frac{\tau\bar{L}\Delta}{\epsilon} + \frac{\tau\bar{L}\Delta\sigma^2}{\epsilon^3}$$

873 which completes the proof.

## 874 D Convergence Analysis of MaC-SPIDER

875 In this section, we provide the proof for Section 4. We first present the following technical lemma.

876 **Lemma D.1.** *We have the following claims:*

- 877 •  $d_{TV}(\mu P^{t+1}, \pi) \leq d_{TV}(\mu P^t, \pi)$ .
- 878 • For  $k \geq 2$ ,  $t_{mix}(2^{-k}) \leq (k-1)\tau_{mix}$ .
- Moreover,

$$\sum_{k=0}^T d_{TV}(\mu P^k, \pi) \leq 3\tau_{mix}, \quad \forall T \geq 0.$$

879 *Proof.* The first two claims are directly from [24].

880 To see the third claim, we note that

$$\begin{aligned} \sum_{k=0}^T d_{TV}(\mu P^k, \pi) &\leq \sum_{k=0}^{\infty} d_{TV}(\mu P^k, \pi) \\ &\leq \sum_{l=0}^{\tau_{mix}} d_{TV}(\mu P^l, \pi) + \sum_{k=0}^{\infty} \sum_{l=t_{mix}(2^{-k})+1}^{t_{mix}(2^{-(k+1)})} d_{TV}(\mu P^l, \pi) \\ &\leq d_{TV}(\mu, \pi)\tau_{mix} + \sum_{k=2}^{\infty} (t_{mix}(2^{-(k+1)}) - t_{mix}(2^{-k}))2^{-k} \\ &\leq d_{TV}(\mu, \pi)\tau_{mix} + \sum_{k=2}^{\infty} k2^{-k}\tau_{mix} \\ &\leq d_{TV}(\mu, \pi)\tau_{mix} + 2\tau_{mix} \end{aligned}$$

881 which completes the proof with  $d_{TV}(\mu, \pi) + 2 \leq 3$ . □

### 882 D.1 Proof of Lemma 4.1 and Proposition 4.3

883 *Proof of Lemma 4.1:* Let  $\tilde{h}_t^i = h(s_{t+i}) - h_\pi$  and  $\tilde{h}(s) = h(s) - h_\pi$ . We have

$$\mathbb{E}_t \left\| \frac{1}{M} \sum_{i=1}^M h(s_{t+i}) - h_\pi \right\|^2 = \frac{1}{M^2} \sum_{i=1}^M \mathbb{E}_t \|\tilde{h}_t^i\|^2 + \frac{2}{M^2} \sum_{i=1}^{M-1} \sum_{j=i+1}^M \mathbb{E}_t \langle \tilde{h}_t^i, \tilde{h}_t^j \rangle.$$

884 First, we show the following useful bound: for any  $s \in \mathcal{S}$ , given  $t \geq 0$  and  $1 \leq i < j$ ,

$$\begin{aligned}
& \left( \sum_{s' \in \mathcal{S}} |P(s_{t+j} = s' \mid s_{t+i} = s) - \pi(s')| \|\tilde{h}(s')\| \right)^2 \\
&= \left( \sum_{s' \in \mathcal{S}} \pi(s')^{-1/2} |P(s_{t+j} = s' \mid s_{t+i} = s) - \pi(s')| \sqrt{\pi(s')} \|\tilde{h}(s')\| \right)^2 \\
&\leq \sum_{s' \in \mathcal{S}} \pi_{\min}^{-1} |P(s_{t+j} = s' \mid s_{t+i} = s) - \pi(s')|^2 \sum_{s' \in \mathcal{S}} \pi(s') \|\tilde{h}(s')\|^2 \\
&\leq \left( \sum_{s' \in \mathcal{S}} \pi_{\min}^{-1/2} |P(s_{t+j} = s' \mid s_{t+i} = s) - \pi(s')| \right)^2 \sigma^2 \\
&\leq 4\sigma^2 \pi_{\min}^{-1} (\max_s d_{TV}(P^{j-i}(\cdot \mid s_t = s) - \pi))^2 \tag{20}
\end{aligned}$$

885 Then, noting that for any  $1 \leq i < j \leq M$ ,

$$\begin{aligned}
\mathbb{E}_t \langle \tilde{h}_t^i, \tilde{h}_t^j \rangle &= \sum_{s \in \mathcal{S}} P(s_{t+i} = s \mid s_t) \sum_{s' \in \mathcal{S}} P(s_{t+j} = s' \mid s_{t+i} = s) \langle \tilde{h}(s), \tilde{h}(s') \rangle \\
&= \sum_{s \in \mathcal{S}} (P(s_{t+i} = s \mid s_t) - \pi(s)) \sum_{s' \in \mathcal{S}} (P(s_{t+j} = s' \mid s_{t+i} = s) - \pi(s')) \langle \tilde{h}(s), \tilde{h}(s') \rangle \\
&\quad + \sum_{s \in \mathcal{S}} \pi(s) \sum_{s' \in \mathcal{S}} (P(s_{t+j} = s' \mid s_{t+i} = s) - \pi(s')) \langle \tilde{h}(s), \tilde{h}(s') \rangle \\
&\quad + \sum_{s \in \mathcal{S}} P(s_{t+i} = s \mid s_t) \sum_{s' \in \mathcal{S}} \pi(s') \langle \tilde{h}(s), \tilde{h}(s') \rangle \\
&\leq \sum_{s \in \mathcal{S}} |P(s_{t+i} = s \mid s_t) - \pi(s)| \sum_{s' \in \mathcal{S}} |P(s_{t+j} = s' \mid s_{t+i} = s) - \pi(s')| \|\tilde{h}(s)\| \|\tilde{h}(s')\| \\
&\quad + \sum_{s \in \mathcal{S}} \pi(s) \sum_{s' \in \mathcal{S}} |P(s_{t+j} = s' \mid s_{t+i} = s) - \pi(s')| \|\tilde{h}(s)\| \|\tilde{h}(s')\| \\
&\leq 4\sigma^2 \pi_{\min}^{-1} \max_s d_{TV}(P^i(\cdot \mid s), \pi) \cdot \max_s d_{TV}(P^{j-i}(\cdot \mid s), \pi) \\
&\quad + 2\sigma^2 \pi_{\min}^{-1/2} \max_s d_{TV}(P^{j-i}(\cdot \mid s), \pi)
\end{aligned}$$

where we use (20) and note  $\sum_{s'} \pi(s') \langle \tilde{h}(s), \tilde{h}(s') \rangle = \langle \tilde{h}(s), \sum_{s'} \pi(s') \tilde{h}(s') \rangle = \langle \tilde{h}(s), \mathbb{E}_{s' \sim \pi}[\tilde{h}(s')] \rangle = 0$ . Further using the fact  $\sum_{t=1}^T \max_s d_{TV}(P^t(\cdot \mid s), \pi) \leq 3\tau_{\text{mix}}$  by Lemma D.1, we obtain

$$\frac{2}{M^2} \sum_{i=1}^{M-1} \sum_{j=i+1}^M \mathbb{E}_t \langle \tilde{h}_t^i, \tilde{h}_t^j \rangle \leq \frac{72\tau_{\text{mix}}^2 \sigma^2}{\pi_{\min} M^2} + \frac{6\tau_{\text{mix}} \sigma^2}{\sqrt{\pi_{\min}} M}.$$

886 Similarly we note that

$$\begin{aligned}
\mathbb{E}_t \|\tilde{h}_t^i\|^2 &= \sum_{s \in \mathcal{S}} P(s_{t+i} = s \mid s_t) \|\tilde{h}(s)\|^2 \\
&= \sum_{s \in \mathcal{S}} (P(s_{t+i} = s \mid s_t) - \pi(s)) \|\tilde{h}(s)\|^2 + \sum_{s \in \mathcal{S}} \pi(s) \|\tilde{h}(s)\|^2 \\
&\leq \sum_{s \in \mathcal{S}} |P(s_{t+i} = s \mid s_t) - \pi(s)| \|\tilde{h}(s)\|^2 + \sigma^2 \\
&\leq \pi_{\min}^{-1} \sum_{s \in \mathcal{S}} |P(s_{t+i} = s \mid s_t) - \pi(s)| \sum_{s \in \mathcal{S}} \pi(s) \|\tilde{h}(s)\|^2 + \sigma^2 \\
&\leq 2\sigma^2 \pi_{\min}^{-1} \max_s d_{TV}(P^i(\cdot \mid s_t), \pi) + \sigma^2
\end{aligned}$$



which then implies by Lemma D.1

$$\frac{1}{M^2} \sum_{i=1}^M \mathbb{E}_t \|\tilde{h}_t^i\|^2 \leq \frac{\sigma^2}{M} + \frac{6\tau_{mix}\sigma^2}{\pi_{min}M^2}.$$

887 Combining all above gives (7).

888 To show (9), we note that

$$\begin{aligned} & \mathbb{E}_t \left\| \frac{1}{M} \sum_{i=1}^M h(s_{t+i}) - h_\pi \right\|^2 \\ &= \mathbb{E}_t \left\| \frac{1}{M} \sum_{i=1}^M h(s_{t+i}) - \mathbb{E}_t \left( \frac{1}{M} \sum_{i=1}^M h(s_{t+i}) \right) + \mathbb{E}_t \left( \frac{1}{M} \sum_{i=1}^M (h(s_{t+i}) - h_\pi) \right) \right\|^2 \\ &\leq 2\mathbb{E}_t \left\| \frac{1}{M} \sum_{i=1}^M h(s_{t+i}) \right\|^2 + 2 \left\| \mathbb{E}_t \left( \frac{1}{M} \sum_{i=1}^M (h(s_{t+i}) - h_\pi) \right) \right\|^2 \end{aligned}$$

889 where we use  $(a+b)^2 \leq 2a^2 + 2b^2$  and  $\mathbb{E}[X - \mathbb{E}(X)]^2 \leq \mathbb{E}[X]^2$ .

890 We note that by replacing  $\tilde{h}(s)$  in (20) by  $h(s)$ ,

$$\begin{aligned} \left\| \mathbb{E}_t \left( \frac{1}{M} \sum_{i=1}^M (h(s_{t+i}) - h_\pi) \right) \right\| &= \left\| \frac{1}{M} \sum_{i=1}^M \sum_{s \in \mathcal{S}} (P(s_{t+i} = s \mid s_t) - \pi(s)) h(s) \right\| \\ &\leq \frac{1}{M} \sum_{i=1}^M \sum_{s \in \mathcal{S}} |P(s_{t+i} = s \mid s_t) - \pi(s)| \|h(s)\| \\ &\leq \frac{2B}{\sqrt{\pi_{min}M}} \sum_{i=1}^M \max_s d_{TV}(P^i(\cdot \mid s), \pi) \\ &\leq \frac{6\tau_{mix}B}{\sqrt{\pi_{min}M}} \end{aligned}$$

891 where we use  $\mathbb{E}_{s \sim \pi} \|h(s)\| \leq (\mathbb{E}_{s \sim \pi} \|h(s)\|^2)^{1/2} \leq B$  and this concludes (8). Moreover, similar to

892 the analysis of  $\mathbb{E}_t \langle \tilde{h}_t^i, \tilde{h}_t^j \rangle$ , we have

$$\begin{aligned} \mathbb{E}_t \left\| \frac{1}{M} \sum_{i=1}^M h(s_{t+i}) \right\|^2 &= \frac{B^2}{M} + \frac{6\tau_{mix}B^2}{\pi_{min}M^2} + \frac{2}{M} \sum_{i=1}^{M-1} \sum_{j=i+1}^M \mathbb{E}_t \langle h(s_{t+i}), h(s_{t+j}) \rangle \\ &\leq \frac{B^2}{M} + \frac{6\tau_{mix}B^2}{\pi_{min}M^2} + \frac{6\tau_{mix}B^2}{\sqrt{\pi_{min}M}} + \frac{72\tau_{mix}^2B^2}{\pi_{min}M^2} \\ &\leq \frac{7\tau_{mix}B^2}{\sqrt{\pi_{min}M}} + \frac{78\tau_{mix}^2B^2}{\pi_{min}M^2} \end{aligned}$$

and hence

$$\mathbb{E}_t \left\| \frac{1}{M} \sum_{i=1}^M h(s_{t+i}) - h_\pi \right\|^2 \leq \frac{14\tau_{mix}B^2}{\sqrt{\pi_{min}M}} + \frac{228\tau_{mix}^2B^2}{\pi_{min}M^2}$$

893 which concludes (9).

894 *Proof of Proposition 4.3:* We denote  $\mathbb{E}_t(\cdot)$  as the expectation conditioning on filtration  $\mathcal{F}_t$ .

895 Note that for  $t \bmod r = 0$ ,

$$\begin{aligned}\mathbb{E}_t \|v_t - \nabla F(x_t)\|^2 &= \mathbb{E}_t \left\| \frac{1}{M_1} \sum_{i=1}^{M_1} g(x_t; s_{N_t+i}) - \nabla F(x_t) \right\|^2 \\ &\leq \frac{7\tau_{mix}\sigma^2}{\sqrt{\pi_{min}}M_1} + \frac{78\tau_{mix}^2\sigma^2}{\pi_{min}M_1^2} \\ &\leq \frac{\epsilon^2}{8}\end{aligned}$$

896 by (7) of Lemma 4.1 and noting  $M_1 = 112\tau_{mix}\pi_{min}^{-1/2}\epsilon^{-2}\max\{\sigma, \sigma^2\}$ .

897 For  $t \bmod r \neq 0$ , conditioning on  $\mathcal{F}_{t+1}$  and letting  $\tilde{g}_{t+1}^{M_2} = \frac{1}{M_2} \sum_{i=1}^{M_2} g(x_{t+1}; s_{N_{t+1}+i}) -$   
898  $g(x_t; s_{N_{t+1}+i})$  yields

$$\begin{aligned}\mathbb{E}_{t+1} \|v_{t+1} - \nabla F(x_{t+1})\|^2 &= \mathbb{E}_{t+1} \left\| v_t - \nabla F(x_t) + \tilde{g}_{t+1}^{M_2} - \nabla F(x_{t+1}) + \nabla F(x_t) \right\|^2 \\ &= \|v_t - \nabla F(x_t)\|^2 + \mathbb{E}_{t+1} \|\tilde{g}_{t+1}^{M_2} - \nabla F(x_{t+1}) + \nabla F(x_t)\|^2 \\ &\quad + 2\langle v_t - \nabla F(x_t), \mathbb{E}_{t+1}[\tilde{g}_{t+1}^{M_2} - \nabla F(x_{t+1}) + \nabla F(x_t)] \rangle \\ &\leq \|v_t - \nabla F(x_t)\|^2 + \mathbb{E}_{t+1} \|\tilde{g}_{t+1}^{M_2} - \nabla F(x_{t+1}) + \nabla F(x_t)\|^2 \\ &\quad + 2\|v_t - \nabla F(x_t)\| \|\mathbb{E}_{t+1}[\tilde{g}_{t+1}^{M_2} - \nabla F(x_{t+1}) + \nabla F(x_t)]\|\end{aligned}$$

899 Noting that  $\mathbb{E}_{t+1, s \sim \pi} \|g(x_{t+1}; s) - g(x_t; s)\| \leq L\|x_{t+1} - x_t\|, \forall s \in \mathcal{S}$  and  $\mathbb{E}_{t+1, s \sim \pi} [g(x_{t+1}; s) -$   
900  $g(x_t; s)] = \nabla F(x_{t+1}) - \nabla F(x_t)$ , combining with (8) and (9) of Lemma 4.1 gives

$$\mathbb{E}_{t+1} \|v_{t+1} - \nabla F(x_{t+1})\|^2 \leq \|v_t - \nabla F(x_t)\|^2 + \frac{12\tau_{mix}B}{\sqrt{\pi_{min}}M_2} \|v_t - \nabla F(x_t)\| + \frac{14\tau_{mix}B^2}{\sqrt{\pi_{min}}M_2} + \frac{228\tau_{mix}^2B^2}{\pi_{min}M_2^2}.$$

where  $B := L \max_t \|x_{t+1} - x_t\|$ . Further noting

$$M_2 = \frac{16\tau_{mix}}{\sqrt{\pi_{min}}\epsilon}, \quad B \leq L \max_t \{\eta_t \|v_t\|\} \leq \frac{\epsilon}{4}$$

901 we have

$$\begin{aligned}\mathbb{E}_{t+1} \|v_{t+1} - \nabla F(x_{t+1})\|^2 &\leq \|v_t - \nabla F(x_t)\|^2 + \frac{\epsilon^2}{4} \|v_t - \nabla F(x_t)\| + \frac{\epsilon^3}{16} + \frac{\epsilon^4}{16} \\ &\leq \|v_t - \nabla F(x_t)\|^2 + \frac{\epsilon}{2} \|v_t - \nabla F(x_t)\|^2 + \frac{1}{8}(\epsilon^3 + \epsilon^4/2)\end{aligned}$$

902 where we use  $\frac{\epsilon^2}{4} \|v_t - \nabla F(x_t)\| \leq \frac{\epsilon}{2} \|v_t - \nabla F(x_t)\|^2 + \frac{1}{2\epsilon}(\frac{\epsilon^2}{4})^2$  in the second inequality. Then  
903 noting that for  $rt_0 \leq t < r(t_0 + 1)$  given any  $t_0 \geq 0$ , we have for  $r = 1/\epsilon$

$$\begin{aligned}\mathbb{E} \|v_t - \nabla F(x_t)\|^2 &\leq (1 + \epsilon/2)^r \mathbb{E} \|v_{rt_0} - \nabla F(x_{rt_0})\|^2 + (1 + \epsilon/2)^r (\epsilon^3 + \epsilon^4/2) \cdot \frac{1}{4\epsilon} \\ &\leq 2 \cdot \frac{\epsilon^2}{8} + \frac{\epsilon^2}{2} + \frac{\epsilon^3}{4} \\ &\leq \frac{3\epsilon^2}{4} + \frac{\epsilon^3}{4}\end{aligned}$$

904 where we use the fact  $(1 + \epsilon/2)^{1/\epsilon} \leq \sqrt{e} \leq 2$  and  $\mathbb{E} \|v_{rt_0} - \nabla F(x_{rt_0})\|^2 \leq \epsilon^2/8$ .

## 905 D.2 Proof of Theorem 4.4

906 Noting  $\bar{L}$ -mean-squared smoothness implies  $\bar{L}$ -smoothness of  $F$ , we have

$$\begin{aligned}F(x_{t+1}) - F(x_t) &\leq \langle \nabla F(x_t), x_{t+1} - x_t \rangle + \frac{\bar{L}}{2} \|x_{t+1} - x_t\|^2 \\ &= -\eta_t \langle \nabla F(x_t), v_t \rangle + \frac{\bar{L}\eta_t^2}{2} \|v_t\|^2 \\ &= -\eta_t \langle \nabla F(x_t) - v_t, v_t \rangle + \frac{\bar{L}\eta_t^2}{2} \|v_t\|^2 - \eta_t \|v_t\|^2 \\ &\leq -\frac{\eta_t}{2} (1 - \bar{L}\eta_t) \|v_t\|^2 + \frac{\eta_t}{2} \|v_t - \nabla F(x_t)\|^2.\end{aligned}$$

907 Noting that  $\eta_t \leq \frac{1}{2\bar{L}}$ , then using the fact that  $\min\{|x|, x^2/2\} \geq |x| - 2, \forall x \in \mathbb{R}$ ,

$$\begin{aligned} \frac{\eta_t}{2} (1 - \bar{L}\eta_t) \|v_t\|^2 &\geq \frac{\eta_t}{4} \|v_t\|^2 \\ &= \frac{\epsilon^2}{16\bar{L}} \min \left\{ \frac{\|v_t\|^2}{2\epsilon^2}, \frac{\|v_t\|}{\epsilon} \right\} \\ &\geq \frac{\epsilon^2}{16\bar{L}} \left( \frac{\|v_t\|}{\epsilon} - 2 \right) \\ &= \frac{\epsilon}{16\bar{L}} \|v_t\| - \frac{\epsilon^2}{8\bar{L}} \end{aligned}$$

908 which hence induces

$$F(x_{t+1}) - F(x_t) \leq -\frac{\epsilon}{16\bar{L}} \|v_t\| + \frac{\epsilon^2}{8\bar{L}} + \frac{1}{4\bar{L}} \|v_t - \nabla F(x_t)\|^2.$$

909 Taking expectation on both sides and using Lemma 4.3 gives

$$\frac{\epsilon}{16\bar{L}} \mathbb{E} \|v_t\| \leq \mathbb{E}[F(x_t) - F(x_{t+1})] + \frac{3\epsilon^2}{8\bar{L}}$$

910 which indicates

$$\begin{aligned} \frac{1}{T} \sum_{t=0}^{T-1} \mathbb{E} \|v_t\| &\leq \frac{16\bar{L}\mathbb{E}[F(x_0) - F(x_T)]}{T\epsilon} + 6\epsilon \\ &\leq \frac{16\bar{L}\Delta_0}{T\epsilon} + 6\epsilon. \end{aligned}$$

911 By  $T = 16\bar{L}\Delta_0\epsilon^{-2}$  we conclude

$$\begin{aligned} \mathbb{E} \|\nabla F(\tilde{x}_T)\| &= \frac{1}{T} \sum_{t=0}^{T-1} \mathbb{E} \|\nabla F(x_t)\| \\ &\leq \frac{1}{T} \sum_{t=0}^{T-1} (\mathbb{E} \|v_t\| + \mathbb{E} \|v_t - \nabla F(x_t)\|) \\ &\leq 7\epsilon. \end{aligned}$$

It is straightforward to see that the total number of samples is upper bounded by

$$\left\lceil \frac{T}{r} \right\rceil (M_1 + M_2 r) = \mathcal{O}(\tau_{mix} \pi_{min}^{-1/2} \epsilon^{-3}).$$
